# Supplementary material for: Arabidopsis thaliana VOZ (Vascular plant One-Zinc finger) transcription factors are required for proper regulation of flowering time
Source: PubMed Central journal article supplement — Biol Open. 2013 Mar 4;2(4):424–31. doi: 10.1242/bio.20133764 (PMC3625871; doi:10.1242/bio.20133764), 2013-03-04
Supplement: supp_bio.20133764_bio.20133764-s1.pdf [file supp_bio.20133764_bio.20133764-s1.pdf]

## Supplementary Material

Helena Celesnik et al. doi: 10.1242/bio.20133764

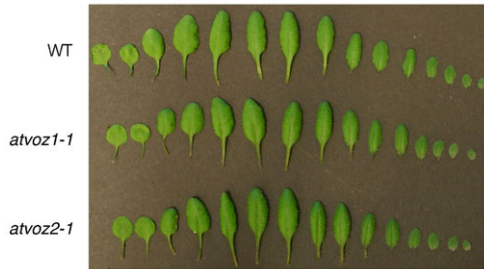

Fig. S1. Comparison of leaves from 4-week-old WT plants and *atvoz1-1* and *atvoz2-1* single mutants.

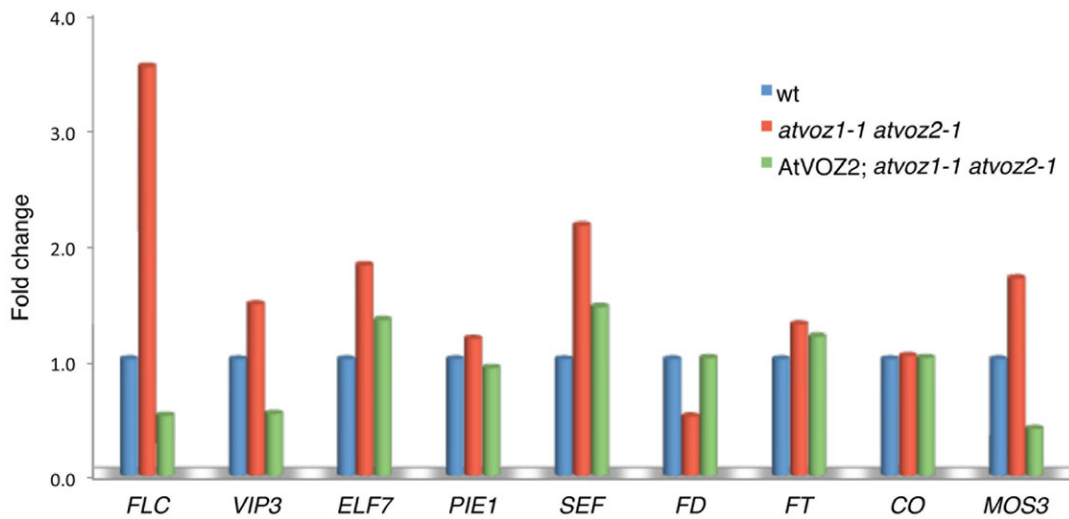

Fig. S2. Expression of flowering genes in *atvoz1-1 atvoz2-1*. RT-PCR reactions from Fig. 3 and Fig. 5A were quantified. Fold change in gene expression was calculated using expression values normalized to cyclophilin.

**Table S1. Flowering time of *atvoz* mutants in long days and short days.** Flowering time was measured by determining the number of rosette leaves at bolting (leaf number) and by counting the number of days to opening of the first flower (days). Mean values  $\pm$  s.e.m. are shown.

| Genotype                   | Long day       |                | Short day      |                 |
|----------------------------|----------------|----------------|----------------|-----------------|
|                            | Leaf number    | Days           | Leaf number    | Days            |
| Wild type                  | 16.2 $\pm$ 0.5 | 42.1 $\pm$ 0.7 | 59.0 $\pm$ 2.2 | 112.0 $\pm$ 3.4 |
| <i>voz1-1</i>              | 18.6 $\pm$ 0.5 | 46.1 $\pm$ 0.7 | ND             | ND              |
| <i>voz2-1</i>              | 20.0 $\pm$ 0.6 | 47.3 $\pm$ 0.8 | ND             | ND              |
| <i>voz1-1 voz2-1</i>       | 40.0 $\pm$ 1.0 | 65.5 $\pm$ 1.5 | 54.6 $\pm$ 5.4 | 153.9 $\pm$ 7.4 |
| VOZ2; <i>voz1-1 voz2-1</i> | 13.4 $\pm$ 0.4 | 39.4 $\pm$ 0.5 | 59.9 $\pm$ 3.5 | 100.0 $\pm$ 5.1 |

**Table S2. Analysis of >100 siliques per line showing silique sizes (mm)±s.d. and the fraction of aborted seeds for WT and *atvoz1-1 atvoz2-1*.**

| Genotype             | Silique size | Aborted seeds           |
|----------------------|--------------|-------------------------|
| Wild type            | 14.5±1.2     | 1.0% ( <i>n</i> =4057)  |
| <i>voz1-1 voz2-1</i> | 9.7±1.7      | 31.9% ( <i>n</i> =9231) |

**Table S3. List of primers used in this study.**

| Gene/vector                     | Forward                                                    | Reverse                                                             |
|---------------------------------|------------------------------------------------------------|---------------------------------------------------------------------|
| <b>Primers for genotyping</b>   |                                                            |                                                                     |
| <i>voz1</i>                     | Voz1-Fw (AtVOZ1gatF)<br>CACCGTCGACATGACGGGGAAGCGATCAAAGAC  | Voz1-Rv (AtVOZ1gatR)<br>CCCGGGGATATAATAGTCGCTTAGATTC                |
| <i>voz2</i>                     | Voz2-Fw (AtVOZ2gatF)<br>CACCGTCGACATGTCAAACCACCCGAAGATC    | Voz2-Rv (AtVOZ2gatR)<br>CCCGGGCTCCTTACGACCTTTGGTTGGAGGAGAGGG        |
| WiscDsLox T-DNA specific primer |                                                            | p745<br>AACGTCCGCAATGTGTTATTAAGTTGTC                                |
| Salk T-DNA specific primer      | LBb1<br>GCGTGGACCGCTTGCTGCAACT                             |                                                                     |
| TAP                             | TMVU1[TAP]sense<br>AACATTACAATTACTATTTAC                   |                                                                     |
| <b>Primers for RT-PCR</b>       |                                                            |                                                                     |
| <i>FLC</i>                      | ATGGGAAGAAAAAACTAGAAATCAA                                  | CTAATTAAGTAGTGGGAGAGTCAC                                            |
| <i>VIP3</i>                     | AACCTCGAGGTCTGAAATCG                                       | TGGTCATTGTGGTTGCTCAT                                                |
| <i>ELF7</i>                     | AACCAACCACCTTCATCTGC                                       | CTCATCCAAGGAAGGAACCA                                                |
| <i>PIE1</i>                     | TTGGCTGTCTGAAGAGGAACT                                      | ATTCTGCAGGGGTGTACCAG                                                |
| <i>SEF</i>                      | At5G37055Fw<br>TGGAGGAAGAGATGTCTGAAC                       | At5G37055Rv<br>CTATGCAACAAATTTCTGACAACG                             |
| <i>FD</i>                       | ATGTTGTCATCAGCTAAGCATCA                                    | TGTCTTCTATTCCCTGAACCTTC                                             |
| <i>FT</i>                       | ATGTCTATAAATAAAGAGACCCTC                                   | CTAAAGTCTTCTTCCCGCAGCCAC                                            |
| <i>CO</i>                       | CACACCATCAAACCTACTACATCTG                                  | CTGAAAATTCTGTTGGTTATGGCAC                                           |
| <i>MOS3/SAR3 (At1G80680)</i>    | At1G80680Fw<br>CAAGGATGGCTAGAGATTTGG                       | At1G80680Rv<br>TTCTTCATCAATGTCAGCTACC                               |
| <i>CYC</i> cyclophilin          | GTC TGA TAG AGA TCT CAC GT                                 | AATCGGCAACAACCACAGGC                                                |
| <b>Primers for EMSA</b>         |                                                            |                                                                     |
| <i>pMOS3</i>                    | pMOS3-Fw<br>GACGTCCGGCGCAGCGTTTATCAGACGCTGGGATT-<br>AAAACA | Cy5/pMOS3-Rv<br>/Cy5/TGTTTTAATCCCAGCGTCTGATAAACGCTGCG-<br>CCGGACGTC |
| <i>pMOS3-m</i>                  | pMOS3-m-Fw<br>GACGTCCGGCGCATTTTTATTTTTTTTGGGATTA-<br>AAACA | Cy5/pMOS3-m-Rv<br>/Cy5/TGTTTTAATCCCCAAAAAATAAAAAATGCG-<br>CCGGACGTC |
| <b>Primers for ChIP</b>         |                                                            |                                                                     |
| <i>MOS3</i>                     | MOS3 UE-F<br>AGGAGGAAAAACGAATTGAGTC                        | MOS3 UE-R<br>CCGAATTCCTTTCCAATTAAGTCAAC                             |
| <i>actin-2</i>                  | ACT2 UE-F<br>GCC ATC AAA GCA AAA GAA CTA ATC               | ACT2 UE-R<br>ATG AAT TTA TAT AGG CGG GTT TAT CTC                    |
